# Supplementary material
Source: Springer Nature journal article supplement (https://www.springerprofessional.de/resource/supplementary/13638_2014_969_MOESM4_ESM.pdf/11898904)

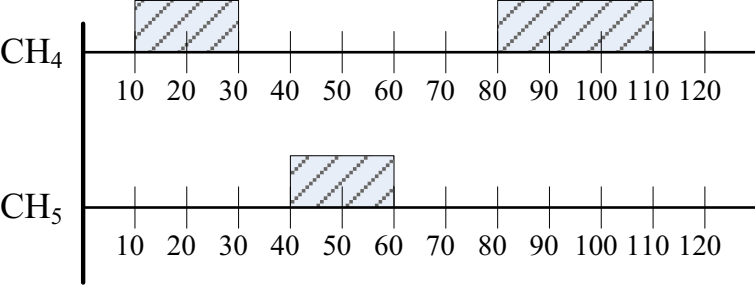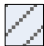

: MPAOPs used by MP<sub>A</sub>

Supplement: MOESM4 [file 11898904]
